# Supplementary material for: Risk of Cancer for Workers Exposed to Antimony Compounds: A Systematic Review
Source: PubMed Central journal article supplement (PMC6888331; doi:10.3390/ijerph16224474), 2019-11-14
Supplement: ijerph-16-04474-s001.pdf [file ijerph-16-04474-s001.pdf]

1

**Supplementary Table S1.** Search string development.

| <b>Human Toxicology</b>                                                                                                                                                                                                                                                                                                                                                                                                                                                                                                                                                                                                                                                                                                                                                                                                                                                                                                                                                                                                                                                                                                                                                                                                                                                                                                                                                                                                                                                                                                                           |
|---------------------------------------------------------------------------------------------------------------------------------------------------------------------------------------------------------------------------------------------------------------------------------------------------------------------------------------------------------------------------------------------------------------------------------------------------------------------------------------------------------------------------------------------------------------------------------------------------------------------------------------------------------------------------------------------------------------------------------------------------------------------------------------------------------------------------------------------------------------------------------------------------------------------------------------------------------------------------------------------------------------------------------------------------------------------------------------------------------------------------------------------------------------------------------------------------------------------------------------------------------------------------------------------------------------------------------------------------------------------------------------------------------------------------------------------------------------------------------------------------------------------------------------------------|
| In PubMed<br>("Antimony"[Mesh] OR "antimony")<br>hits: 6960<br>("Occupational Exposure"[Mesh] OR "work *") AND ("Antimony"[Mesh] OR "antimony")<br>hits: 328<br>("Occupational Exposure"[Mesh] OR "work *"[All Fields]) AND ("Antimony"[Mesh] OR "antimony"[All Fields]) AND ("Neoplasms"[Mesh] OR "cancer"[All Fields] OR "canc*"[All Fields])<br>hits: 26 (28/06/2018)<br>In ToxLine<br>(occupational exposure OR work *) AND antimony AND (cancer OR neoplas *)<br>hits: 113 (28/06/2018)                                                                                                                                                                                                                                                                                                                                                                                                                                                                                                                                                                                                                                                                                                                                                                                                                                                                                                                                                                                                                                                      |
| <b>Animal and Mechanistic Toxicology</b>                                                                                                                                                                                                                                                                                                                                                                                                                                                                                                                                                                                                                                                                                                                                                                                                                                                                                                                                                                                                                                                                                                                                                                                                                                                                                                                                                                                                                                                                                                          |
| In PubMed<br>("Mammals"[Mesh] AND ("Antimony"[Mesh] OR "antimony"[All Fields]) AND ("Neoplasms"[Mesh] OR "cancer"[All Fields] OR "canc *"[All Fields]))<br>hits: 330<br>("Mammals"[Mesh] AND ("Antimony"[Mesh] OR "antimony"[All Fields]) AND ("Neoplasms"[Mesh] OR "cancer"[All Fields] OR "canc *"[All Fields]) NOT "sentinel")<br>hits: 261<br>("Mammals"[Mesh] AND ("Antimony"[Mesh] OR "antimony"[All Fields]) AND ("Neoplasms"[Mesh] OR "cancer"[All Fields] OR "canc *"[All Fields]) NOT ("sentinel" OR Leishman * OR schistosom *))<br>hits: 205<br>("Mammals"[Mesh] AND ("Antimony"[Mesh] OR "antimony"[All Fields]) AND ("Neoplasms"[Mesh] OR "cancer"[All Fields] OR "canc *"[All Fields]) NOT ("sentinel" OR Leishman * OR schistosom *))<br>hits: 205<br>("Antimony"[Mesh] OR "antimony"[All Fields]) AND ("Neoplas *"[All Fields] OR "cancer"[All Fields] OR "carcinog *"[All Fields]) NOT ("sentinel" OR Leishman * OR schistosom *)<br>hits: 117 (28/06/2018)<br>Additional PubMed search<br>("antimony"[MeSH Terms] OR "antimony"[All Fields]) AND ("toxicity"[Subheading] OR "toxicity"[All Fields]) AND ("In Vivo"[Journal] OR "In Vivo (Brooklyn)"[Journal] OR ("in"[All Fields] AND "vivo"[All Fields]) OR "in vivo"[All Fields])<br>hits: 45 (28/06/2018)<br>In ToxLine<br>Mammals AND Antimony AND (Neoplasms OR cancer OR canc *)<br>hits: 136<br>antimony AND (Neoplas * OR cancer OR carcinog *)<br>hits (03/07/2018): 392<br>Additional ToxLine search<br>antimony AND toxicity AND "In Vivo"<br>hits: 31 (03/07/2018) |

2

3

4

**Supplementary Table S2.** Inclusion/Exclusion criteria.

| <b>Human Toxicology</b>  |                                                                                                                                                                                                                                                                                                                                                                                                                                                                                                                                                                               |                                                                                                                                                                                                                                                                |
|--------------------------|-------------------------------------------------------------------------------------------------------------------------------------------------------------------------------------------------------------------------------------------------------------------------------------------------------------------------------------------------------------------------------------------------------------------------------------------------------------------------------------------------------------------------------------------------------------------------------|----------------------------------------------------------------------------------------------------------------------------------------------------------------------------------------------------------------------------------------------------------------|
|                          | <b>Exclusion</b>                                                                                                                                                                                                                                                                                                                                                                                                                                                                                                                                                              | <b>Inclusion</b>                                                                                                                                                                                                                                               |
| General                  | complete study unavailable review-article, language other than English, focused on poisoning/overdose, study doesn't contain original data, antimony not mentioned in title/abstract                                                                                                                                                                                                                                                                                                                                                                                          | complete study available, articles written in English, study contains original data, antimony mentioned in title/abstract                                                                                                                                      |
| Specific                 | study on environmental/residential everyday exposure to antimony compounds, study in children, study on antimony compounds as treatment of disease (e.g., schistosomiasis, leishmaniasis), no cancer related endpoint, case studies                                                                                                                                                                                                                                                                                                                                           | study on occupational exposure to antimony compounds                                                                                                                                                                                                           |
| <b>Animal Toxicology</b> |                                                                                                                                                                                                                                                                                                                                                                                                                                                                                                                                                                               |                                                                                                                                                                                                                                                                |
|                          | <b>Exclusion</b>                                                                                                                                                                                                                                                                                                                                                                                                                                                                                                                                                              | <b>Inclusion</b>                                                                                                                                                                                                                                               |
| General                  | complete study unavailable, review-article, language other than English, focused on poisoning/overdose, study doesn't contain original data, antimony not mentioned in title/abstract                                                                                                                                                                                                                                                                                                                                                                                         | complete study available, articles written in English, study contains original data                                                                                                                                                                            |
| Specific                 | non-mammalian models, endpoint not relevant to PECO or not mentioned, route of administration is other than that of interest (e.g., IV or IM injection), route of administration not mentioned, effects in non-relevant tissues/cells, dose/concentration of exposure is not biologically relevant, dose/concentration of exposure is not relevant/convertible to Reference Value (ReV) development, research concerning drugs and drug development, research concerning antimony compounds in relation to cancer cells, research on scintigraphy or sentinel node procedures | mammalian models, endpoint mentioned and relevant to PECO, route of administration is mentioned and same than that of interest, effects in relevant tissues/cells, dose/concentration of exposure is relevant/convertible to Reference Value (ReV) development |

5

6 **Supplementary Table S3.** Study selection human toxicology studies.

|                                                                                                                      | <b>Human toxicology</b>                                                                                                                                                        |                                                                                                                                                                                                    |
|----------------------------------------------------------------------------------------------------------------------|--------------------------------------------------------------------------------------------------------------------------------------------------------------------------------|----------------------------------------------------------------------------------------------------------------------------------------------------------------------------------------------------|
|                                                                                                                      | Pubmed                                                                                                                                                                         | ToxLine                                                                                                                                                                                            |
| Search Terms                                                                                                         | ("Occupational Exposure"[Mesh] OR "work*"[All Fields]) AND ("Antimony"[Mesh] OR "antimony"[All Fields]) AND ("Neoplasms"[Mesh] OR "cancer"[All Fields] OR "canc*"[All Fields]) | (occupational exposure OR work*) AND antimony AND (cancer OR neoplas*)                                                                                                                             |
| Hits: date and number                                                                                                | 28/06/2018: 26                                                                                                                                                                 | 28/06/2018: 113                                                                                                                                                                                    |
| Articles, excluding duplicates in search, retained independently per reviewer (AS: Anton Saerens; MG: Manosij Ghosh) | AS 7 articles, MG 7 articles                                                                                                                                                   | AS 9 articles, MG 11 articles                                                                                                                                                                      |
| Articles about which reviewers agreed                                                                                | 7 articles                                                                                                                                                                     | 9 articles                                                                                                                                                                                         |
| Articles about which reviewers disagreed                                                                             | 0 articles                                                                                                                                                                     | 2 articles: Sweeney 1985[22] Wingren 1990[23]                                                                                                                                                      |
| Additionally included and excluded articles after discussion (+rationale)                                            | 0 articles                                                                                                                                                                     | Articles included after discussion: 2 articles: Sweeney 1985 (Antimony not in Abstract, but included based on full text); Wingren 1990 (Antimony not in Abstract, but included based on full text) |
| Articles excluded (no original data)                                                                                 | 0 articles                                                                                                                                                                     | 1 article: Gerhardsson 1988[24]: uses same data as Gerhardsson 1993[25]                                                                                                                            |
| remaining hits:                                                                                                      | 7                                                                                                                                                                              | 10                                                                                                                                                                                                 |
|                                                                                                                      | Final pool: 10 articles                                                                                                                                                        |                                                                                                                                                                                                    |

8

**Supplementary Table S4.** Study selection animal toxicology studies

|                                                                                                                      | <b>Animal Toxicology</b>                                                                                                                                                                                                                     |                                                                                                                                                                                                    |
|----------------------------------------------------------------------------------------------------------------------|----------------------------------------------------------------------------------------------------------------------------------------------------------------------------------------------------------------------------------------------|----------------------------------------------------------------------------------------------------------------------------------------------------------------------------------------------------|
|                                                                                                                      | Pubmed                                                                                                                                                                                                                                       | ToxLine                                                                                                                                                                                            |
| Search Terms                                                                                                         | ("Antimony"[Mesh] OR "antimony"[All Fields]) AND ("Neoplas*" OR "cancer"[All Fields] OR "carcinog*" [All Fields]) NOT ("sentinel" OR leishman* OR schistosom*)                                                                               | antimony AND (Neoplas* OR cancer OR carcinog*)                                                                                                                                                     |
| Hits: date and number                                                                                                | 03/07/2018: 117                                                                                                                                                                                                                              | 03/07/2018: 392                                                                                                                                                                                    |
| Articles, excluding duplicates in search, retained independently per reviewer (AS: Anton Saerens; MG: Manosij Ghosh) | AS 3 articles, MG 5 articles                                                                                                                                                                                                                 | AS 10 articles, MG 13 articles                                                                                                                                                                     |
| Articles about which reviewers agreed                                                                                | 2 articles                                                                                                                                                                                                                                   | 10 articles                                                                                                                                                                                        |
| Articles about which reviewers disagreed                                                                             | 4 articles: Zhang 2018[26] Kotsopoulos 2012[27] Rossi 1987[28] Sunderman 1983[29]                                                                                                                                                            | 3 articles: Zhang 2018 Sunderman 1983, Rossi 1987                                                                                                                                                  |
| Additionally included and excluded articles after discussion (+rationale)                                            | Articles excluded after discussion: Zhang 2018 (human cancer cells implanted in immunodeficient mice) Kotsopoulos 2012 (no animal study), Rossi 1987 (uncertain relevance to health endpoint), Sunderman 1983 (intramuscular administration) | Articles excluded after discussion: Zhang 2018 (excluded earlier) Sunderman 1983 (intramuscular administration); Rossi 1987 (uncertain relevance to health endpoint)                               |
| Articles excluded (no original data)                                                                                 | 0 articles                                                                                                                                                                                                                                   | 1 article: Dieter 1991[30]: uses same data as Dieter 1992[31]                                                                                                                                      |
| remaining hits:                                                                                                      | 2                                                                                                                                                                                                                                            | 9                                                                                                                                                                                                  |
|                                                                                                                      |                                                                                                                                                                                                                                              | NB: many of the references identified in this search are duplicates OR are integral parts of other studies identified with this search. In this last case, only the complete studies were counted. |

9

10

| <b>Animal Toxicology</b>                                                                                                   |                                                                                                                                                                                                                                                       |                                         |
|----------------------------------------------------------------------------------------------------------------------------|-------------------------------------------------------------------------------------------------------------------------------------------------------------------------------------------------------------------------------------------------------|-----------------------------------------|
|                                                                                                                            | Pubmed                                                                                                                                                                                                                                                | ToxLine                                 |
| Additional Search Terms                                                                                                    | ("antimony"[MeSH Terms] OR "antimony"[All Fields])<br>AND ("toxicity"[Subheading] OR "toxicity"[All Fields])<br>AND ("In Vivo"[Journal] OR "In Vivo<br>(Brooklyn)"[Journal] OR ("in"[All Fields] AND<br>"vivo"[All Fields]) OR "in vivo"[All Fields]) | antimony AND toxicity AND "In Vivo"     |
| Hits: date and number                                                                                                      | 03/07/2018: 45                                                                                                                                                                                                                                        | 03/07/2018: 31                          |
| Articles, excluding duplicates in search,<br>retained independently per reviewer (AS:<br>Anton Saerens; MG: Manosij Ghosh) | AS 5 articles, MG 6 articles                                                                                                                                                                                                                          | AS 7 articles, MG 8 articles            |
| Articles about which reviewers agreed                                                                                      | 5 articles                                                                                                                                                                                                                                            | 7 articles                              |
| Articles about which reviewers disagreed                                                                                   | 1 article: Zhang 2018: excluded earlier                                                                                                                                                                                                               | 1 article: Zhang 2018: excluded earlier |
| Articles excluded (no original data)                                                                                       | 1 article: Gurnani 1993[33]: uses same data as Gurnani<br>1992[32]                                                                                                                                                                                    | 0 articles                              |
| remaining hits:                                                                                                            | 4                                                                                                                                                                                                                                                     | 7                                       |
| Final pool: 13 articles                                                                                                    |                                                                                                                                                                                                                                                       |                                         |

Supplementary Table S5. Critical appraisal human toxicology studies

| General study scoring criteria |               |                              |              |                          |                                       |                  |                                            |                          |                                |                            |                                         |                            |                     |                                |
|--------------------------------|---------------|------------------------------|--------------|--------------------------|---------------------------------------|------------------|--------------------------------------------|--------------------------|--------------------------------|----------------------------|-----------------------------------------|----------------------------|---------------------|--------------------------------|
| Reference                      | Original data | Applicable route of exposure | Single route | Range of doses/exposures | Exposure concentration known/measured | Blinded study    | Health effects relevant to ReV development | Single chemical exposure | Appropriate endpoints measured | Measured outcomes reported | Study design sufficient/clearly defined | Calculation of sample size | Confounding factors | Appropriate research practices |
| Gerhardsson 1982[37]           | 1             | 1                            | 0            | -1                       | -1                                    | 0/not applicable | 1                                          | 1                        | 1                              | 1                          | 1                                       | -1                         | -1                  | 1                              |
| Sweeney 1985[22]               | 1             | 1                            | 0            | -1                       | -1                                    | 0/not applicable | 1                                          | -1                       | 1                              | 1                          | -1                                      | -1                         | -1                  | 1                              |
| Wingren 1987[5]                | 1             | 1                            | 0            | -1                       | -1                                    | 0/not applicable | 1                                          | -1                       | 1                              | 1                          | 1                                       | 0                          | -1                  | -1                             |
| Wingren 1990[23]               | 1             | 1                            | 0            | -1                       | -1                                    | 0/not applicable | 1                                          | -1                       | 1                              | 1                          | -1                                      | 0                          | -1                  | 1                              |
| Finkelstein 1991[39]           | 1             | 1                            | 0            | -1                       | 1                                     | 0/not applicable | 1                                          | -1                       | 1                              | 1                          | -1                                      | 0                          | -1                  | 1                              |
| Gerhardsson 1993[25]           | 1             | 1                            | 0            | -1                       | -1                                    | 0/not applicable | 1                                          | -1                       | 1                              | 1                          | 1                                       | -1                         | -1                  | 1                              |
| Wingren 1993[4]                | 1             | 1                            | 0            | -1                       | 0                                     | 0/not applicable | 1                                          | -1                       | 1                              | 1                          | 1                                       | 0                          | -1                  | -1                             |
| Jones 1994[35]                 | 1             | 1                            | 0            | -1                       | -1                                    | 0/not applicable | 1                                          | -1                       | 1                              | 1                          | 1                                       | 0                          | -1                  | 1                              |
| Schnorr 1995[38]               | 1             | 1                            | 0            | 1                        | 1                                     | 0/not applicable | 1                                          | -1                       | 1                              | 1                          | 1                                       | 0                          | -1                  | 1                              |
| Jones 2007[36]                 | 1             | 1                            | 0            | 1                        | 1                                     | 0/not applicable | 1                                          | -1                       | 1                              | 1                          | 1                                       | 0                          | -1                  | 1                              |

| Human study scoring criteria |                               |                       |                   |                                                      | Study Selection                              |                          |                                             |
|------------------------------|-------------------------------|-----------------------|-------------------|------------------------------------------------------|----------------------------------------------|--------------------------|---------------------------------------------|
| Reference                    | Appropriate comparison groups | Follow up of subjects | Temporal relation | Consistency of results with other available evidence | Total points (General + Human study scoring) | Acute (A) or Chronic (C) | Key (K), Supporting (S), or Informative (I) |
| Gerhardsson 1982[37]         | 0                             | 0                     | -1                | 0                                                    | 3                                            | C                        | I                                           |
| Sweeney 1985[22]             | 0                             | 0                     | 1                 | 1                                                    | 2                                            | C                        | I                                           |
| Wingren 1987[5]              | 0                             | 0                     | 1                 | 0                                                    | 2                                            | C                        | I                                           |
| Wingren 1990[23]             | 0                             | 0                     | 1                 | 0                                                    | 2                                            | C                        | I                                           |
| Finkelstein 1991[39]         | 1                             | 0                     | 1                 | 1                                                    | 6                                            | C                        | I                                           |
| Gerhardsson 1993[25]         | 0                             | 0                     | -1                | 0                                                    | 1                                            | C                        | I                                           |
| Wingren 1993[4]              | 0                             | 0                     | 1                 | 0                                                    | 3                                            | C                        | I                                           |
| Jones 1994[35]               | 0                             | 1                     | 1                 | 1                                                    | 6                                            | C                        | S                                           |
| Schnorr 1995[38]             | 0                             | 0                     | 1                 | 1                                                    | 9                                            | C                        | S/K                                         |
| Jones 2007[36]               | 1                             | 0                     | 1                 | 1                                                    | 10                                           | C                        | S                                           |

Supplementary Table S6. Critical appraisal animal toxicology studies

| Reference                                                              | General study scoring criteria                 |                              |              |                          |                                       |               |                                            |                          |                                |                            |                                         |                            |                     |                                |
|------------------------------------------------------------------------|------------------------------------------------|------------------------------|--------------|--------------------------|---------------------------------------|---------------|--------------------------------------------|--------------------------|--------------------------------|----------------------------|-----------------------------------------|----------------------------|---------------------|--------------------------------|
|                                                                        | Original data                                  | Applicable route of exposure | Single route | Range of doses/exposures | Exposure concentration known/measured | Blinded study | Health effects relevant to ReV development | Single chemical exposure | Appropriate endpoints measured | Measured outcomes reported | Study design sufficient/clearly defined | Calculation of sample size | Confounding factors | Appropriate research practices |
| Schroeder/Kanisawa 1969[44]                                            | 1                                              | 1                            | 1            | 0                        | 0                                     | 0             | 1                                          | 1                        | -1                             | 1                          | -1                                      | -1                         | 0                   | -1                             |
| Schroeder 1970[45]                                                     | 1                                              | 1                            | 1            | 0                        | 0                                     | 0             | 1                                          | 1                        | -1                             | 1                          | 1                                       | -1                         | 0                   | 1                              |
| Watt 1983[21]                                                          | scoring impossible based on data of NTP report |                              |              |                          |                                       |               |                                            |                          |                                |                            |                                         |                            |                     |                                |
| Groth 1986[41]                                                         | 1                                              | 1                            | 1            | 0                        | 1                                     | 0             | 1                                          | -1                       | 1                              | 1                          | 1                                       | -1                         | -1                  | 1                              |
| Ainsworth 1991[42]                                                     | 1                                              | 1                            | 1            | 1                        | 1                                     | 0             | 1                                          | 1                        | -1                             | 0                          | -1                                      | -1                         | 0                   | -1                             |
| Gurnani 1992 (1)[32]                                                   | 1                                              | 1                            | 1            | 1                        | 0                                     | 0             | 0                                          | -1                       | 1                              | 1                          | 1                                       | -1                         | -1                  | -1                             |
| Gurnani 1992 (2)[20]                                                   | scoring impossible based on abstract           |                              |              |                          |                                       |               |                                            |                          |                                |                            |                                         |                            |                     |                                |
| Poon 1998[46]                                                          | 1                                              | 1                            | 1            | 1                        | 0                                     | 0             | 1                                          | 1                        | 1                              | 0                          | 0                                       | -1                         | 0                   | 1                              |
| Newton 1994                                                            | 1                                              | 1                            | 1            | 1                        | 1                                     | 0             | 1                                          | 1                        | 1                              | 0                          | 1                                       | -1                         | 0                   | 1                              |
| Elliott 1998[43] (liver DNA repair and bone marrow micronucleus assay) | 1                                              | 1                            | 1            | 1                        | 1                                     | 1             | 0                                          | 1                        | 1                              | 1                          | 0                                       | -1                         | 0                   | 1                              |
| Dieter 1992[31]                                                        | 1                                              | 1                            | 1            | 1                        | 1                                     | 0             | 1                                          | 1                        | 1                              | 0                          | 1                                       | -1                         | 0                   | 1                              |
| Kirkland 2007[34]                                                      | 1                                              | 1                            | 1            | 1                        | 1                                     | 1             | 0                                          | 1                        | 1                              | 1                          | 1                                       | -1                         | 0                   | 1                              |
| NTIS/NTP 2016[16]                                                      | 1                                              | 1                            | 1            | 1                        | 1                                     | 1             | 1                                          | 1                        | 1                              | 1                          | 1                                       | -1                         | 0                   | 1                              |

| Reference                                                              | Animal study scoring criteria                  |            |                  |                                         |                                          |                                    | Study Selection                               |                          |                                             |
|------------------------------------------------------------------------|------------------------------------------------|------------|------------------|-----------------------------------------|------------------------------------------|------------------------------------|-----------------------------------------------|--------------------------|---------------------------------------------|
|                                                                        | Multiple species                               | Both sexes | Exposure regimes | Study design sufficient/clearly defined | Identical conditions across study groups | Dose applicable to ReV development | Total points (General + Animal study scoring) | Acute (A) or Chronic (C) | Key (K), Supporting (S), or Informative (I) |
| Schroeder/Kanisawa 1969[44]                                            | 0                                              | 1          | 0                | 1                                       | 1                                        | 0                                  | 5 C                                           | I                        |                                             |
| Schroeder 1970[45]                                                     | 0                                              | 1          | 0                | 1                                       | 1                                        | 0                                  | 9 C                                           | I                        |                                             |
| Watt 1983[21]                                                          | scoring impossible based on data of NTP report |            |                  |                                         |                                          |                                    | / C                                           | I                        |                                             |
| Groth 1986[41]                                                         | 0                                              | 1          | 0                | 1                                       | 0                                        | 1                                  | 9 C                                           | I                        |                                             |
| Ainsworth 1991[42]                                                     | 0                                              | 0          | 1                | -1                                      | 1                                        | 0                                  | 4 SA                                          | I                        |                                             |
| Gurnani 1992 (1)[32]                                                   | 0                                              | 0          | 1                | 1                                       | 1                                        | 0                                  | 6 A                                           | I                        |                                             |
| Gurnani 1992 (2)[20]                                                   |                                                |            |                  |                                         |                                          |                                    | / A                                           | I                        |                                             |
| Poon 1998[46]                                                          | 0                                              | 1          | 1                | 1                                       | 1                                        | 1                                  | 12 SA                                         | S                        |                                             |
| Newton 1994                                                            | 0                                              | 1          | 1                | 1                                       | 1                                        | 1                                  | 14 C                                          | S                        |                                             |
| Elliott 1998[43] (liver DNA repair and bone marrow micronucleus assay) | 0                                              | 0          | 1                | 1                                       | 1                                        | 0                                  | 12 A/SA                                       | I                        |                                             |
| Dieter 1992[31]                                                        | 1                                              | 1          | 1                | 1                                       | 1                                        | 1                                  | 15 A/SA                                       | I                        |                                             |
| Kirkland 2007[34]                                                      | 0                                              | 1          | 1                | 1                                       | 1                                        | 0                                  | 14 SA                                         | I                        |                                             |
| NTIS/NTP 2016[16]                                                      | 1                                              | 1          | 1                | 1                                       | 1                                        | 1                                  | 17 SA/C                                       | K                        |                                             |
